# Supplementary material for: Comparison of ice dynamics using full-Stokes and Blatter–Pattyn approximation: application to the Northeast Greenland Ice Stream
Source: Copernicus journal article supplement (doi:10.5194/tc-16-1675-2022), 2022-05-05
Supplement: Supplementary file 1 [file tc-16-1675-2022-supplement.pdf]

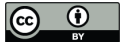

*Supplement of*

## **Comparison of ice dynamics using full-Stokes and Blatter–Pattyn approximation: application to the Northeast Greenland Ice Stream**

**Martin Rückamp et al.**

*Correspondence to:* Martin Rückamp ([martin.rueckamp@badw.de](mailto:martin.rueckamp@badw.de)) and Angelika Humbert ([angelika.humbert@awi.de](mailto:angelika.humbert@awi.de))

The copyright of individual parts of the supplement might differ from the article licence.

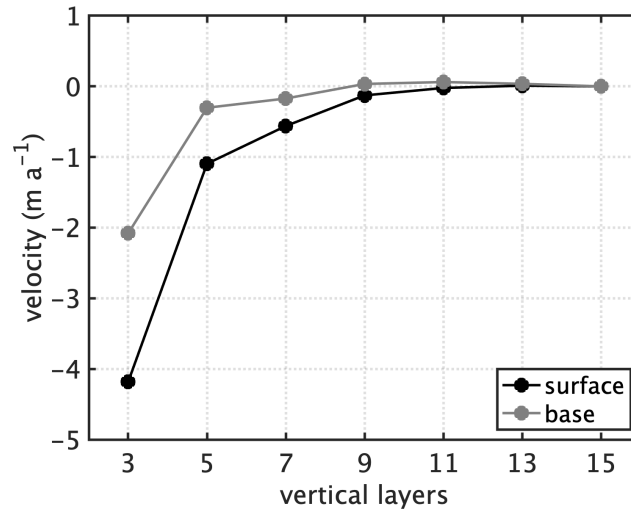

**Figure S1.** Surface and basal area-averaged velocity for different numbers of vertical layers. Velocity is presented relative to simulation results obtained with 15 vertical layers. Results are shown for FS,  $E = 1$ ,  $m = 1$ , P1P1GLS-strong applied to the ice stream region with a horizontal resolution of  $l = 400$  m.

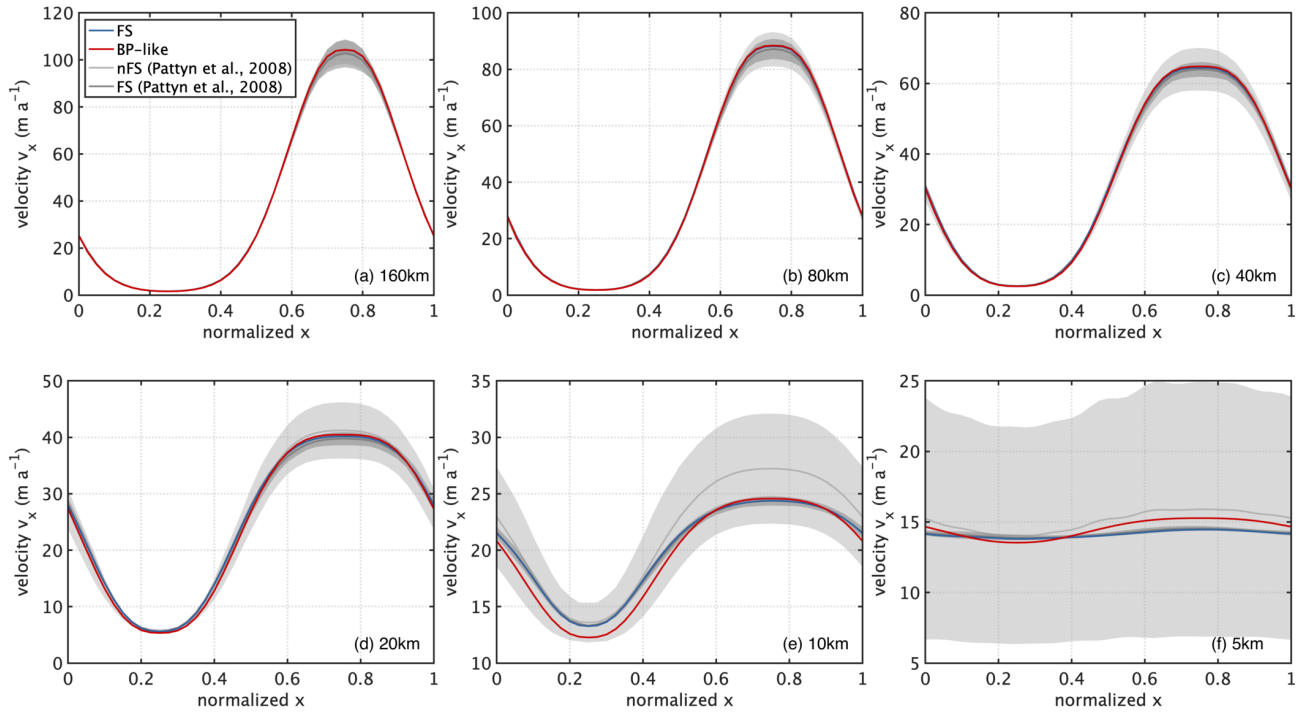

**Figure S2.** Results of ISMIP-HOM benchmark Exp. A. Surface velocity component  $v_x$  ( $\text{m a}^{-1}$ ) across the bump at  $y = L/4$  for different length scales, with  $L$  ranging from 160 to 5 km. Values computed in the study for FS and BP-like with P1P1GLS-strong are compared to results by simpler models (nFS) and FS from the ISMIP-HOM benchmark (Pattyn et al., 2008).

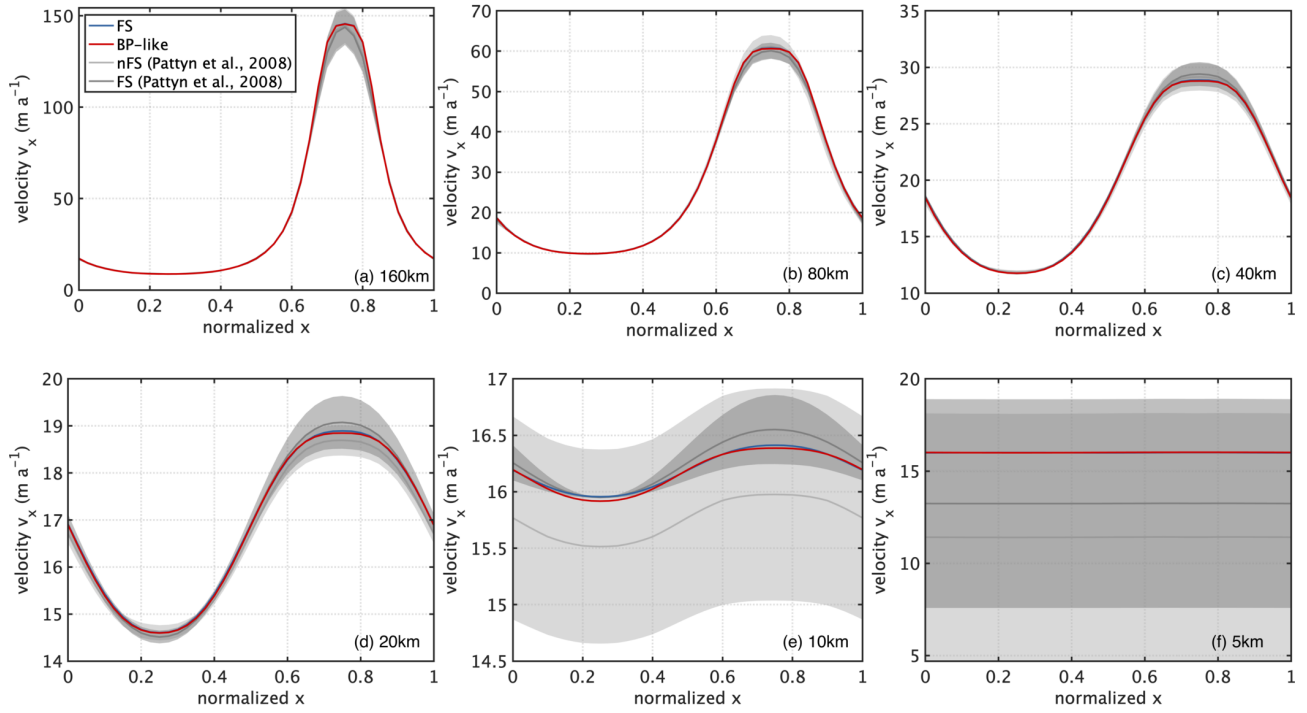

**Figure S3.** Results of ISMIP-HOM benchmark Exp. C. Surface velocity component  $v_x$  ( $\text{m a}^{-1}$ ) across the bump at  $y = L/4$  for different length scales, with  $L$  ranging from 160 to 5 km. Values computed in the study for FS and BP-like with P1P1GLS-strong are compared to results by simpler models (nFS) and FS from the ISMIP-HOM benchmark (Pattyn et al., 2008).

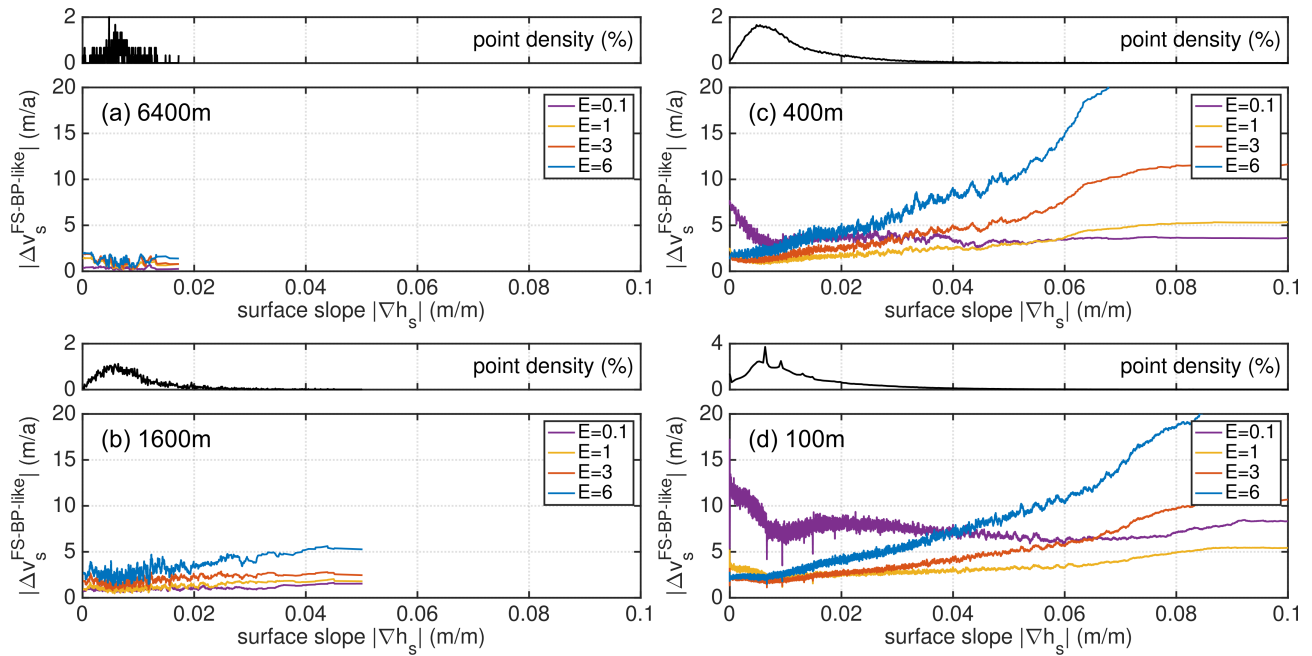

**Figure S4.** Line plots of the absolute surface velocity difference between FS and BP-like ( $|\Delta v_s^{\text{FS-BP-like}}|$ ) with PIP1GLS-strong versus the surface slope for a resolution of  $l = 6400$  m (a), a resolution of  $l = 1600$  m (b), a resolution of  $l = 400$  m (c), and a resolution of  $l = 100$  m (d). A moving mean with a window of 2500 data points is applied.

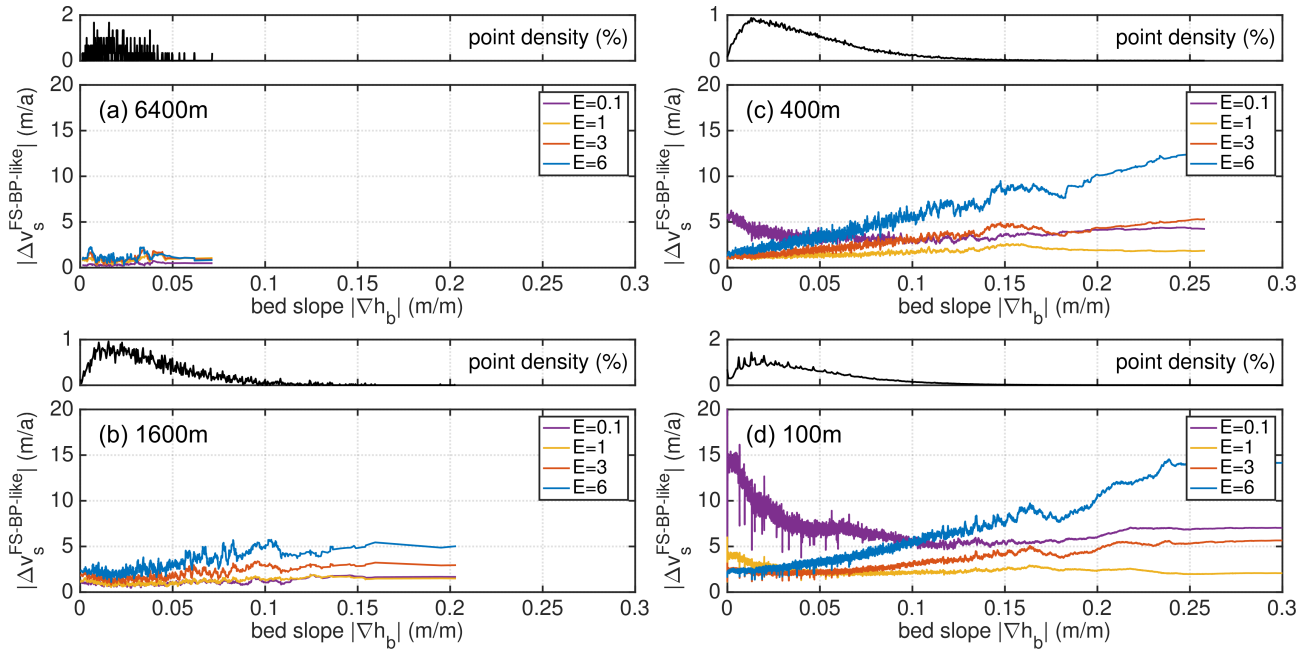

**Figure S5.** Line plots of the absolute surface velocity difference between FS and BP-like ( $|\Delta v_s^{\text{FS-BP-like}}|$ ) with PIP1GLS-strong versus the bed slope for a resolution of  $l = 6400$  m (a), a resolution of  $l = 1600$  m (b), a resolution of  $l = 400$  m (c), and a resolution of  $l = 100$  m (d). A moving mean with a window of 2500 data points is applied.

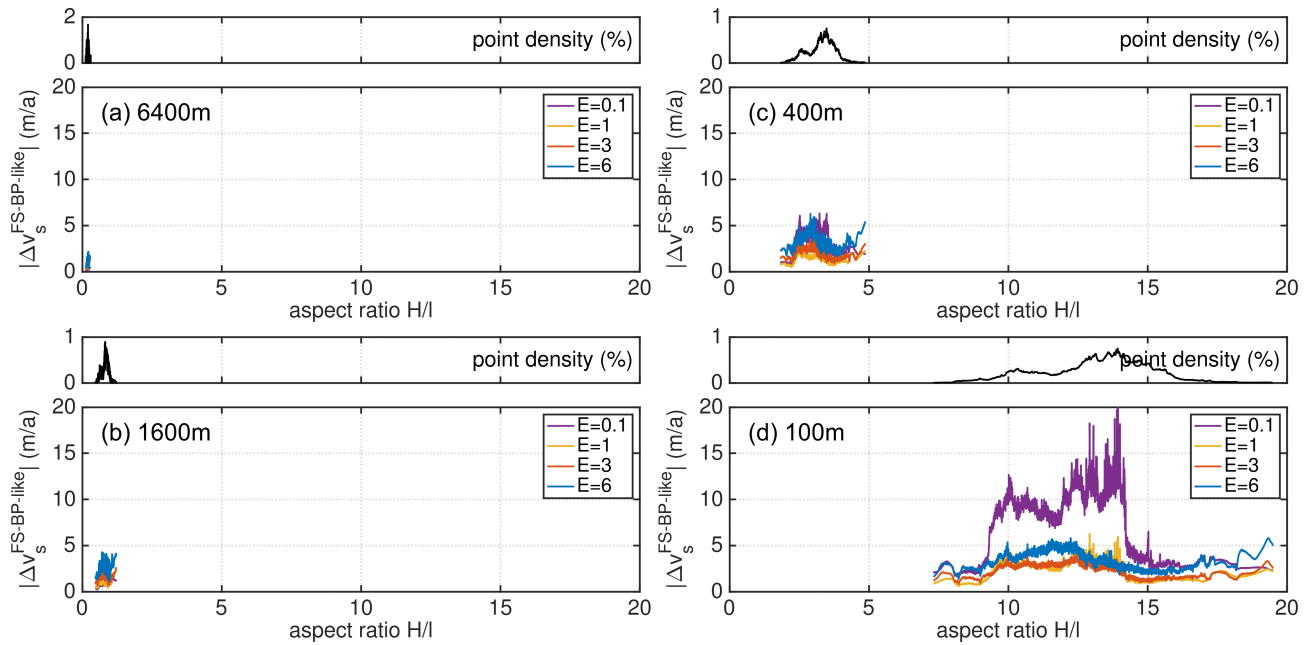

**Figure S6.** Line plots of the absolute surface velocity difference between FS and BP-like ( $|\Delta v_s^{\text{FS-BP-like}}|$ ) with P1P1GLS-strong versus the local aspect ratio for a resolution of  $l = 6400$  m (a), a resolution of  $l = 1600$  m (b), a resolution of  $l = 400$  m (c), and a resolution of  $l = 100$  m (d). A moving mean with a window of 2500 data points is applied.

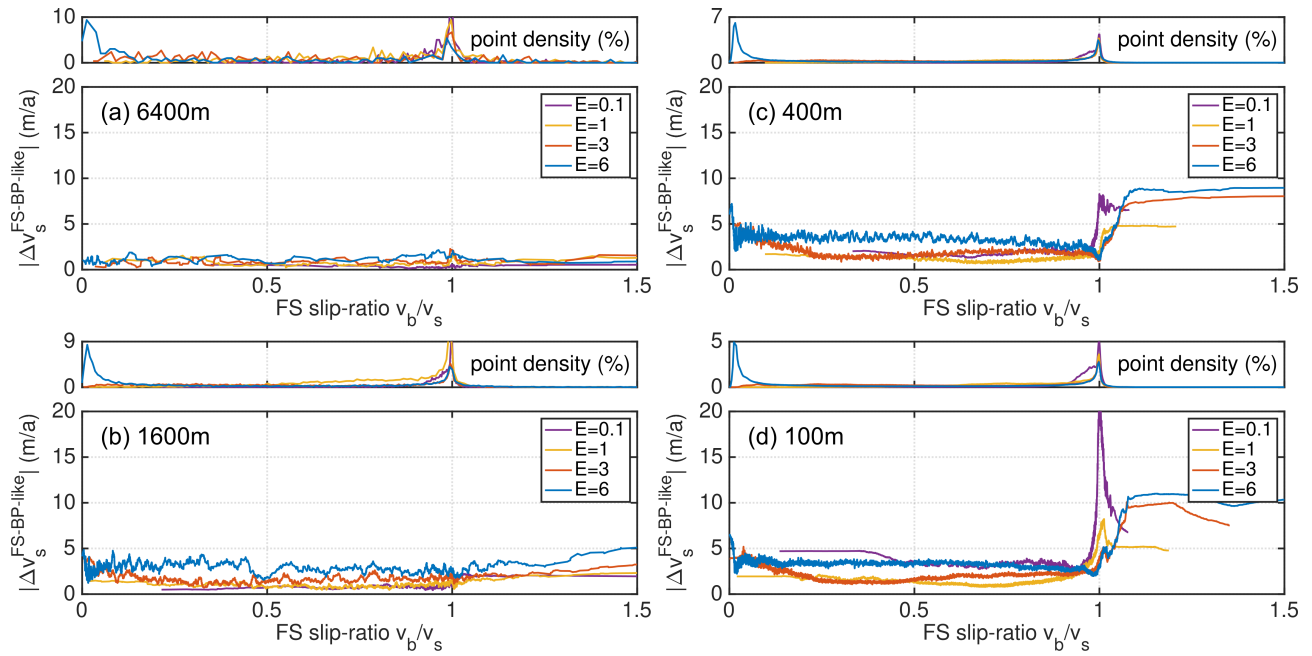

**Figure S7.** Line plots of the absolute surface velocity difference between FS and BP-like ( $|\Delta v_s^{\text{FS-BP-like}}|$ ) with PIP1GLS-strong versus the FS slip ratio ( $v_b/v_s$ ) for a resolution of  $l = 6400$  m (a), a resolution of  $l = 1600$  m (b), a resolution of  $l = 400$  m (c), and a resolution of  $l = 100$  m (d). A moving mean with a window of 2500 data points is applied.



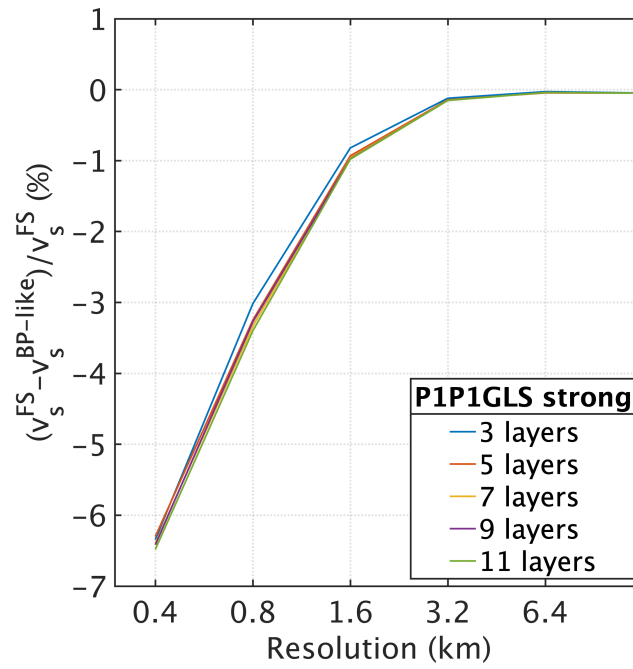

**Figure S8.** Relative surface velocity differences of spatially averaged surface velocities from FS and BP-like stress regimes for  $m=3$  and P1P1GLS-strong. The coloured lines indicate the number of vertical layers.

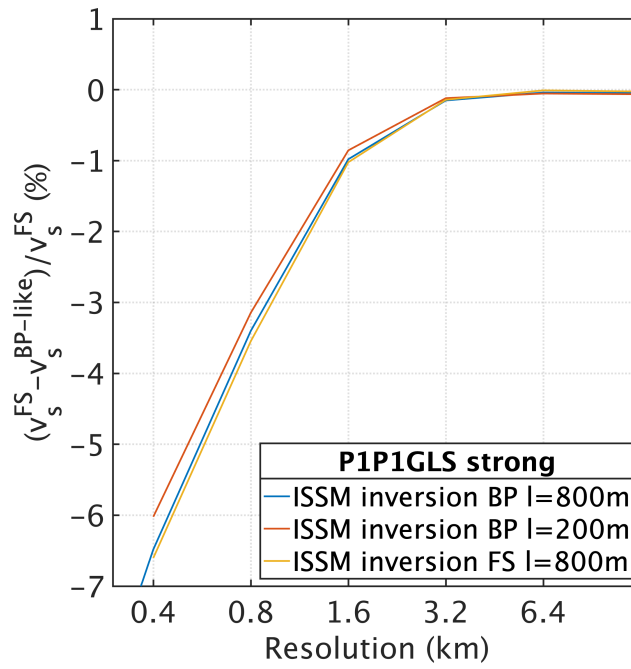

**Figure S9.** Relative surface velocity differences of spatially averaged surface velocities from FS and BP-like stress regimes for  $m=3$  and P1P1GLS-strong. The coloured lines indicate the inferred friction coefficient with ISSM used as input for COMSOL.

## References

- Pattyn, F., Perichon, L., Aschwanden, A., Breuer, B., de Smedt, B., Gagliardini, O., Gudmundsson, G. H., Hindmarsh, R. C. A., Hubbard, A., Johnson, J. V., Kleiner, T., Kononov, Y., Martin, C., Payne, A. J., Pollard, D., Price, S., Rückamp, M., Saito, F., Souček, O., Sugiyama, S., and Zwinger, T.: Benchmark experiments for higher-order and full-Stokes ice sheet models (ISMIP-HOM), *The Cryosphere*, 2, 95–108, <https://doi.org/10.5194/tc-2-95-2008>, 2008.
- 5
